# Supplementary material for: A search map for organic additives and solvents applicable in high-voltage rechargeable batteries
Source: Royal Society of Chemistry journal article supplement (doi:10.1039/c6cp05800k), 2016-01-01
Supplement: c6cp05800k1.pdf [file c6cp05800k1.pdf]

## Supporting Information

Search map for organic additives and solvents applicable in high-voltage  
rechargeable batteries

Min Sik Park,<sup>\*a</sup> Insun Park,<sup>b</sup> Yoon-Sok Kang,<sup>b</sup> Dongmin Im<sup>b</sup> and Seok-Gwang Doo<sup>b</sup>

<sup>a</sup>Computer-Aided Engineering Group, Samsung Advanced Institute of Technology, Samsung  
Electronics, 130 Samsung-ro, Suwon, Gyeonggi-do 443-803, Republic of Korea

<sup>b</sup>Energy Laboratory, Samsung Advanced Institute of Technology, Samsung Electronics, 130  
Samsung-ro, Suwon, Gyeonggi-do 443-803, Republic of Korea

\* E-mail addresses: [ms91.park@samsung.com](mailto:ms91.park@samsung.com) (M. S. Park)

**Table S1** Functional groups included in the molecular descriptor of organic compounds

| Category             | Functional groups                                                                                                                                                                                                                            |
|----------------------|----------------------------------------------------------------------------------------------------------------------------------------------------------------------------------------------------------------------------------------------|
| Oxygen group (11)    | alcohol, carbonyl, aldehyde, haloformyl, carbonate ester, carboxyl, ester, methoxy, hydroperoxy, peroxy, ether                                                                                                                               |
| Nitrogen group (20)  | amide, secondary amine, tertiary amine, primary ketamine, secondary ketamine, primary aldimine, secondary aldimine, imide, azide, azo, cyanate, isocyanate, nitrate, nitrile, isonitrile, nitrosooxy, nitro, nitroso, pyridyl, primary amine |
| Sulfur group (11)    | sulphydryl, sulfide, disulfide, sulfinyl, sulfonyl, sulfino, sulfo, thiocyanate, isothiocyanate, thione, thial                                                                                                                               |
| Phosphorus group (4) | phosphine, phosphono, phosphate, phosphodiester                                                                                                                                                                                              |
| Boron group (4)      | borono, boronate, borino, borinate                                                                                                                                                                                                           |

**Table S2** Classification of organic compounds (with  $E_{\text{ox}} > 6 V_{\text{Li}}$  and  $E_{\text{rd}} < 0 V_{\text{Li}}$ ) based on functional groups and their abundance.

|          | Alcohol | Carboxyl   | Ester | Ether | Amide |
|----------|---------|------------|-------|-------|-------|
| Alcohol  | 1201    | 457 (217*) | 129   | 246   | 308   |
| Carboxyl |         | 1106       | 183   | 156   | 355   |
| Ester    |         |            | 855   | 161   | 101   |
| Ether    |         |            |       | 1140  | 53    |
| Amide    |         |            |       |       | 602   |
| Net      | 458     | 320        | 454   | 666   | 83    |

\* Number of organic compounds with ternary functional groups of “alcohol+carboxyl+amide,” which is the most abundant combination among the ternary groups.

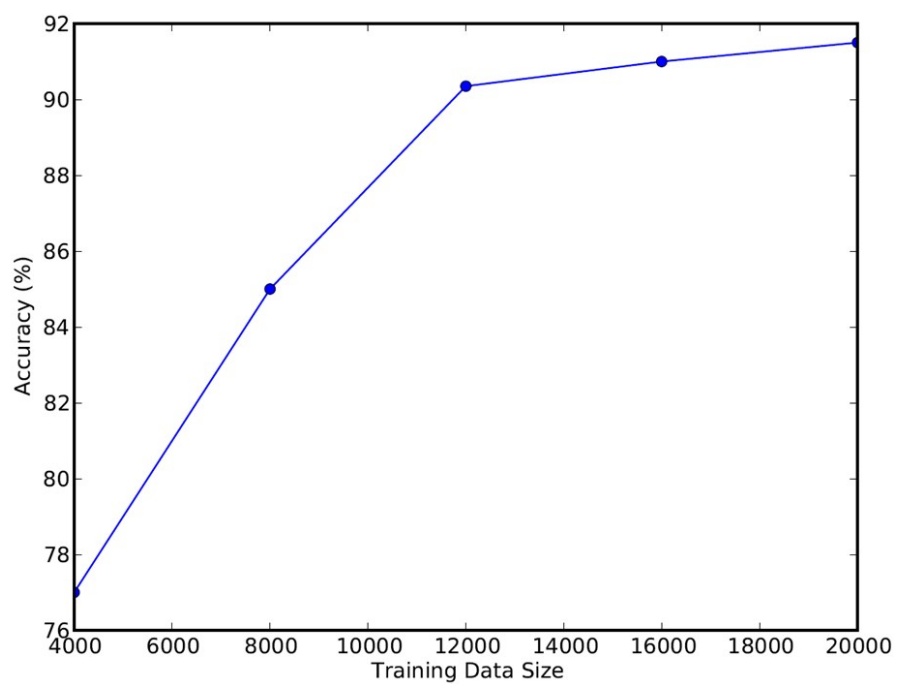

**Fig. S1** Accuracy dependence on training data set size, where the accuracy (%) is obtained by the formula (number of test data with error less than 0.5 V)/(total number of test data) $\times$ 100.

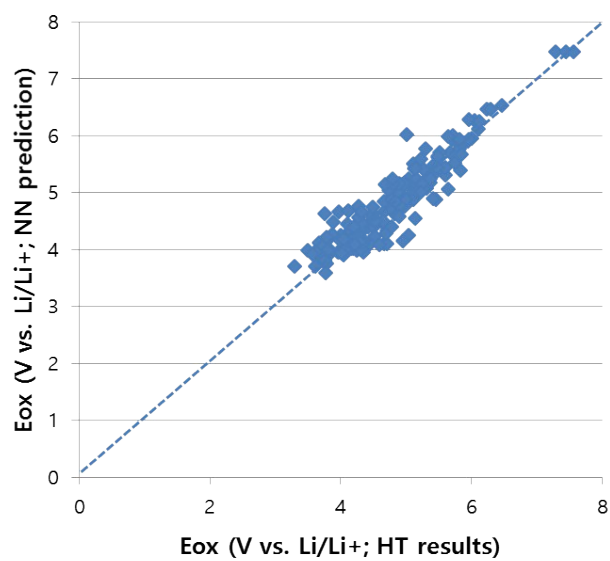

**Fig. S2** Comparison of oxidation potentials ( $E_{\text{ox}}$ ) calculated by the quantum chemical method with those predicted by the neural network method in the MAMMBU system.

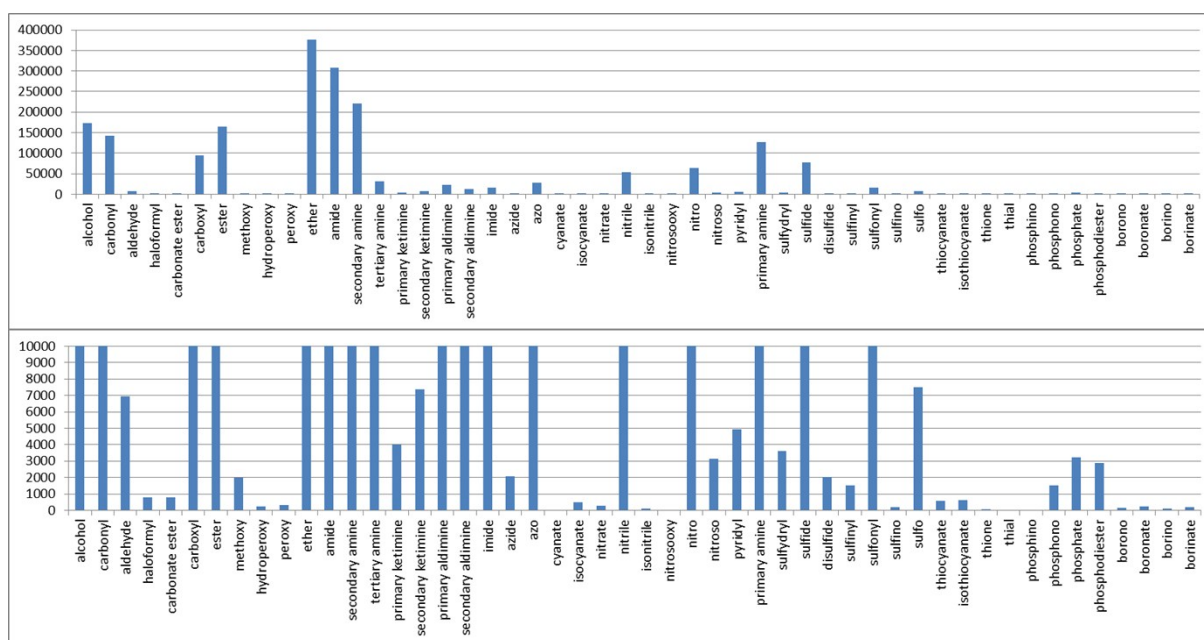

**Fig. S3** Classification of 1M organic compounds according to 50 functional groups. (top) the range of ordinate in the graph is between 0 to 400,000, (bottom) the range of ordinate is magnified between 0 to 10,000. Both are same graph and have the same abscissa.
